# Supplementary material for: Sensitivity Analysis of Intracellular Signaling Pathway Kinetics Predicts Targets for Stem Cell Fate Control
Source: PLOS journal article supplement (doi:10.1371/journal.pcbi.0030130), 2007-06-29
Supplement: S1 (10.1371/journal.pcbi.0030130.s001) [file journal.pcbi.0030130.s001]

**Supplementary Figure 1**

**Diagrammatic representation of the signal network structure of the JAK/STAT3 pathway and mathematical representation**


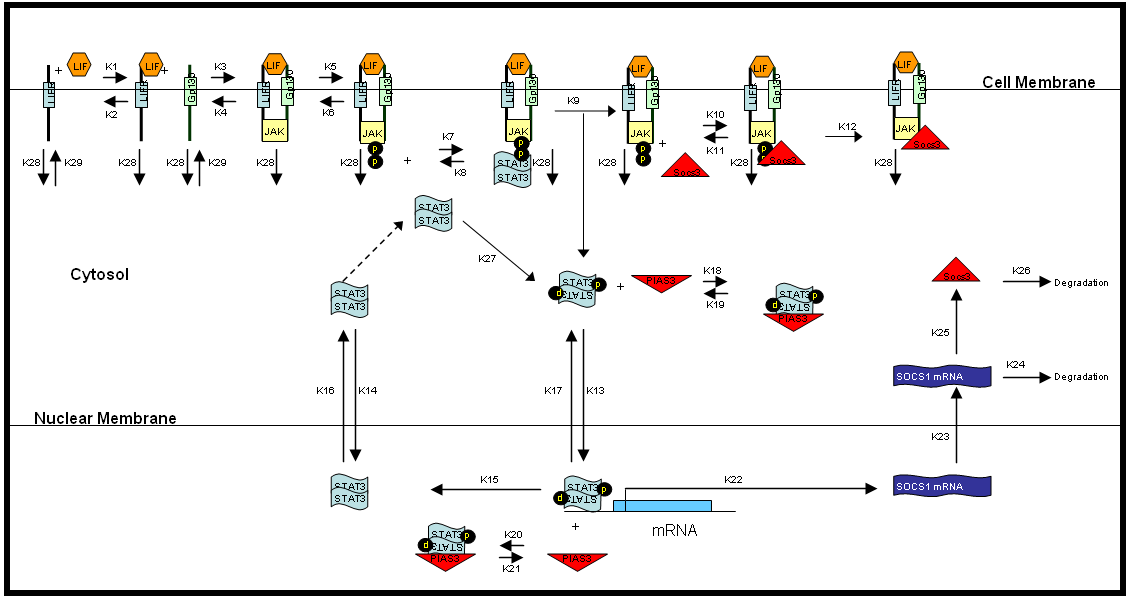


**Y1**

**Y2**

**Y3**

**Y4**

**Y5**

**Y6**

**Y7**

**Y5**

**Y19**

**Y8**

**Y9**

**Y17**

**Y10**

**Y16**

**Y15**

**Y14**

**Y11**

**Y12**

**Y8**

**Y18**

**Y13**

Mathematical representation of the pathway:
